1 **Objectively measured physical activity among people with and**  
2 **without HIV in Uganda: associations with cardiovascular risk and**  
3 **coronary artery disease**

4 Chinonso C. Opara<sup>1</sup>, MD | Christine Horvat Davey, PhD, RN<sup>2</sup> | Cissy Kityo, MBChB,  
5 MD<sup>3</sup> | Ellen Brinza<sup>4</sup> | Rashidah Nazzindah, MBChB, MD<sup>3</sup> | Marcio Summer Bittencourt<sup>5</sup> |  
6 Vitor Oliveira, PhD<sup>6</sup> | Allison R. Webel, PhD, RN, FAAN<sup>6</sup> | Chris T. Longenecker, MD<sup>1,7</sup>  
7

8 <sup>1</sup>University of Washington, Department of Medicine, Division of Cardiology, Seattle, USA

9 <sup>2</sup>Frances Payne Bolton School of Nursing, Case Western Reserve University,  
10 Cleveland, USA

11 <sup>3</sup>Joint Clinical Research Center, Kampala, Uganda

12 <sup>4</sup>Cleveland Clinic Lerner College of Medicine at Case Western Reserve University,  
13 Cleveland, USA

14 <sup>5</sup>University of Sao Paulo, Sao Paulo, Brazil

15 <sup>6</sup>University of Washington School of Nursing, Seattle, WA, USA

16 <sup>7</sup>Department of Global Health, University of Washington, Seattle, USA  
17  
18  
19

20 **Address reprint requests and correspondence:**

21 Chris Longenecker, MD

22 University of Washington, 3980 15<sup>th</sup> Ave., Box 351620

23 Seattle, WA, USA 98195

24 [ctlongen@uw.edu](mailto:ctlongen@uw.edu)

25 **ABSTRACT**

26

27 **Background:** Africa has a disproportionate burden of HIV-related cardiovascular  
28 disease. We aimed to describe physical activity in people living with HIV (PLHIV) and  
29 people without HIV (PWOH) in Uganda and characterize its relationship with the  
30 presence of computed tomography angiography-detected (CCTA) coronary artery  
31 disease (CAD).

32

33 **Methods:** We performed a cross-sectional analysis of the Ugandan Study of HIV  
34 Effects on the Myocardium and Atherosclerosis using Computed Tomography  
35 (mUTIMA-CT) cohort. From 2017-2019, physical activity in PLHIV and PWOH was  
36 assessed by accelerometry over seven days. Participants additionally underwent CCTA.  
37 Univariable and multivariable modified Poisson regression was used to analyze the  
38 relationship between physical activity and CAD presence.

39

40 **Results:** 168 participants were analyzed. The median (IQR) age was 57 (53-58) years  
41 old and 64% were female. Males had more moderate-to-vigorous physical activity per  
42 week [68 minutes (12-144) vs 15 minutes (0-50),  $P<0.001$ ] and less light physical  
43 activity [788 minutes (497-1,202) vs [1,059 (730-1490),  $P=0.001$ ] compared to females,  
44 but there was no difference by HIV status. After adjusting for age, which accounted for  
45 10% of the variation in steps taken, and sex, no significant associations were found  
46 between physical activity and coronary plaque.

47

48 **Conclusion:** Objectively measured physical activity was low compared to guideline  
49 recommendations, with males being somewhat more active than females and without  
50 significant differences by HIV status. Physical activity was not associated with the  
51 presence of CAD independently of age and sex.

52

53 **Keywords:** HIV, cardiovascular disease, sedentary, accelerometry, correlation

54

55

56

57

58

## 59 **CLINICAL PERSPECTIVE**

### 60 **What is new?**

- 61 • For the first time, we describe objective physical activity patterns in people living  
62 with HIV (PLHIV) and people without HIV (PWOH) in the Ugandan context.  
63 Overall, few people met guideline recommendations for physical activity. Males  
64 had more moderate-to-vigorous physical activity and were more likely to meet  
65 guideline recommendations compared to females, without significant difference  
66 by HIV status.  
67
- 68 • In contrast, females had more light physical activity compared to males. Although  
69 light physical activity appeared to have a stronger inverse relationship with  
70 coronary artery disease (CAD) in PLHIV compared to PWOH in stratified models,  
71 the relationship was significantly confounded by age and sex.  
72

### 73 **What are the clinical implications?**

- 74 • Larger studies are needed to further investigate the relationship between  
75 physical activity and CAD in Africa—including any modifying influence of sex or  
76 HIV status. In the meantime, our study suggests there is significant room to  
77 enhance physical activity in Uganda.  
78
- 79 • Age informs the relationship between physical activity and CAD, and our study  
80 suggests efforts to emphasize exercise as the population ages may play a role in  
81 reducing CAD burden.

## 82 INTRODUCTION

83 Africa is disproportionately impacted by HIV and HIV-related cardiovascular disease  
84 (CVD). Mirroring outcomes in higher-resourced countries, increased life-expectancy due  
85 to more widely available antiretroviral therapy (ART) has led to higher rates of age-  
86 related comorbidities, such as CVD, non-Autoimmune Deficiency Syndrome (AIDS)  
87 malignancies and liver disease<sup>1</sup>. Over the past two decades, the global burden of HIV-  
88 associated CVD has tripled and accounts for 2.6 million disability-adjusted life-years per  
89 year, with the highest impact in Africa and the Asia-Pacific areas<sup>2</sup>. Key risk factors for  
90 CVD in people living with HIV (PLHIV) include hypertension<sup>3</sup>, diabetes mellitus<sup>4</sup>,  
91 dyslipidemia<sup>5,6</sup>, obesity<sup>3</sup>, inflammation<sup>6</sup>, low nadir CD4+ count, and smoking<sup>3</sup>.

92  
93 Physical activity is a key preventive factor for CVD. Physical activity and exercise  
94 training interventions improve cardiovascular health, decrease CVD risk, and mitigate  
95 morbidity and mortality in those with CVD<sup>6</sup>. For instance, eight weeks of moderate  
96 intensity exercise resulted in improved aerobic fitness, reduced blood pressure and  
97 increased CD4 cells for PLHIV in Nigeria<sup>7</sup>. Despite the proven benefits, the majority of  
98 PLHIV in Africa do not seem to engage in regular physical activity<sup>8</sup>. However, most prior  
99 research has relied on self-reported measures of physical activity, which has been  
100 shown to overestimate physical activity compared to gold-standard objective measures  
101 of physical activity, such as accelerometry<sup>9</sup>.

102  
103 Atherosclerotic cardiovascular disease (ASCVD) risk can be assessed using risk  
104 prediction scores or objective measures of subclinical disease; however, risk prediction  
105 scores may not strongly correlate with subclinical disease in Africa. For example,  
106 research conducted in Uganda and Botswana demonstrated only modest correlations  
107 between pre-clinical atherosclerosis measures and the pooled cohort equation's ASCVD  
108 risk score<sup>3</sup>. More research is needed to address non-traditional risk factors unique to  
109 this region, including infectious and environmental factors such as latent tuberculosis  
110 and air pollution<sup>3</sup>. In the meantime, enhancing physical activity and fitness is a low-cost  
111 approach to ASCVD risk reduction in Africa.

112  
113 Our study was designed to compare objective measures of physical activity among  
114 PLHIV and a similar population of people without HIV (PWOH), which has not  
115 previously been described in Uganda. Secondly, we aimed to evaluate the relationship  
116 between physical activity metrics and ASCVD risk, coronary artery disease (CAD)  
117 presence by coronary computed tomography angiography (CCTA), and severity of CAD  
118 by coronary CTA. Lastly, we sought to assess whether HIV status and/or sex modify the  
119 relationship between physical activity and CAD.

## 120 121 METHODS

### 122 Participant Selection

123 The Ugandan study of HIV effects on the Myocardium and Atherosclerosis using  
124 Computed Tomography (mUTIMA-CT), conducted in Kampala, Uganda, is an ongoing  
125 prospective cohort investigation examining the impact of HIV on the myocardium and  
126 atherosclerosis. In this phase of the study, PLHIV were age- (within 3 years) and sex-  
127 matched in a 1:1 ratio with PWOH controls. PLHIV were recruited from the Joint Clinical

128 Research Centre (JCRC) in Lubowa, Uganda, which is near Kampala. PWOH were  
129 recruited from community or hospital-based internal medicine clinics in Kampala. To be  
130 eligible for inclusion, PLHIV must have been on ART for more than six months without  
131 any changes in regimen within 12 weeks prior to enrollment. All participants, regardless  
132 of HIV status, were  $\geq 45$  years old and had at least one cardiovascular disease (CVD)  
133 risk factor, such as hypertension, low high-density lipoprotein cholesterol, diabetes  
134 mellitus, smoking, or a family history of early CAD. Exclusion criteria were a history of  
135 known CVD, peripheral artery disease, ischemic stroke, uncontrolled chronic  
136 inflammatory conditions, pregnancy, use of chemotherapy or immunomodulating  
137 agents, or an estimated glomerular filtration rate (eGFR) less than 30 ml/minute.  
138

139 The original cohort comprised of 100 PLHIV and 100 PWOH enrolled from April 2015 to  
140 May 2017. Previous publications have detailed the findings and methods of the baseline  
141 examination of the original cohort<sup>10-13</sup>. Follow-up examinations were conducted from  
142 2017 to 2019, with total cohort size of 200 participants maintained by replacing those  
143 lost to follow-up with age- and sex-matched individuals. This follow-up consisted of 2  
144 study visits separated by 7 days, during which physical activity metrics were collected  
145 via accelerometry. This current study is a cross-sectional analysis of those data among  
146 participants with accelerometry data duration of at least 10 hours per day on at least 4  
147 days<sup>14,15</sup>, which is described as valid wear time.  
148

149 The study protocol was approved by the University Hospitals Cleveland Medical Center  
150 Institutional Review Board, the JCRC Research Ethics Committee, and the Uganda  
151 National Council for Science and Technology, with all participants providing written  
152 informed consent prior to any study procedures.  
153

### 154 **Physical Activity**

155 Self-reported measures of physical activity were assessed using the International  
156 Physical Activity Questionnaire – Short Form (IPAQ-SF). This was developed as a tool  
157 for international monitoring of physical activity and sedentary time<sup>16</sup>. The IPAQ-SF  
158 contains a series of 7 questions, requiring participant recall of light, moderate, and  
159 vigorous physical activity time, as well as sedentary time over the preceding 7 days. The  
160 amount of light, moderate, and vigorous physical activity per day was multiplied by the  
161 number of days performing those activities to get the amount of activity per week. The  
162 amount of time spent sitting per day was multiplied by 7 to obtain the amount of  
163 sedentary time per week.  
164

165 Objective measures of physical activity were assessed by accelerometry. Participants  
166 were instructed to wear an Actigraph®wGT3X+-BT monitor (Actigraph, LLC, Pensacola,  
167 FL) for 7 days on their non-dominant hip. Physical activity metrics of interest were steps  
168 per day, light physical activity time per week, moderate-to-vigorous physical activity time  
169 per week, and sedentary time per week. The number of steps per day was derived by  
170 dividing the number of total steps recorded by the number of valid wear days. Other  
171 physical activity metrics were derived by dividing the amount of activity time by the  
172 number of valid days and multiplying by 7. Data was sampled at 30 Hz, using 60-  
173 second epochs and the normal filter. Bouted physical activity was used to measure

174 physical activity accumulation over 10 minutes or more. Different intensities of physical  
175 activity were defined by adult cut-points for tri-axial accelerometers<sup>17</sup>. In this validation,  
176 moderate-to-vigorous activity was defined as achieving at least 3 metabolic equivalents  
177 and was predicted by achieving at least 2,960 triaxial counts per minute. Valid wear time  
178 was determined by data recorded for at least 10 hours per day for at least 4 days.  
179 Accelerometry data was analyzed using Actilife software.

180

### 181 **Atherosclerotic Cardiovascular Disease Risk**

182 10-year ASCVD risk was quantified using the pooled-cohort equation<sup>18</sup>. The following  
183 variables were utilized: age, sex, and smoking status were obtained by self-report;  
184 diabetes was defined as a chart confirmed diagnosis or on medication for diabetes;  
185 hypertension treatment was defined as receiving medication to lower blood pressure.  
186 Systolic and diastolic blood pressure were obtained at the initial visit by trained study  
187 staff. Total cholesterol, high density lipoprotein, and calculated low-density lipoprotein  
188 concentrations were measured by the JCRC clinical lab from fasting blood drawn at the  
189 initial visit. Notably, we chose to use the “other race” term, since the African American  
190 term has not been validated in the East African population. Further, the nature of  
191 atherosclerotic cardiovascular disease risk may be different in the East African  
192 population compared to the population from which the pooled-cohort equation was  
193 derived<sup>10</sup>. Elevated ASCVD risk was defined as 10-year ASCVD risk  $\geq 5\%$ , which is the  
194 threshold to consider use of statin therapy to reduce ASCVD risk<sup>18</sup>.

195

### 196 **Coronary Artery Disease**

197 At visit 2, all participants underwent coronary computed tomography angiography  
198 (CCTA) on a 128-slice Siemens Somatom scanner at Nsambya St. Francis Hospital in  
199 Kampala. Participants were ineligible to have intravenous contrast for CCTA if their  
200 estimated GFR was not greater than 60 mL/min/1.73m<sup>2</sup>. Data acquisition was  
201 additionally limited for some participants by other technical reasons (e.g., inability to  
202 adequately lower the heart rate with betablockers) (Figure 1). The acquisition and image  
203 analysis protocols were developed in alignment with the Society of Cardiovascular  
204 Computed Tomography Guidelines<sup>19</sup>. Participants were given 100 mg of oral metoprolol  
205 two hours prior to the scan. They were additionally given another 50 mg dose 30  
206 minutes prior to the scan if the heart rate was elevated above 60 beats per minute.

207

208 The CT scans were first read by a local radiologist for clinically significant findings and  
209 were subsequently read offline in batch by a single expert reader (MSB) for research.  
210 Scans that were of poor technical quality were excluded from analysis. Segment  
211 involvement score (SIS) was defined as the total number of disease segments.  
212 Segment severity score (SSS) was calculated using a luminal obstruction weight for that  
213 segment (x1 if <25% obstruction, x2 if 25–50%, x3 if 50–70%, x4 if 70–99% and x5 if  
214 totally occluded), giving a  
215 maximum possible SSS of 90 for an 18-segment model. The presence of CAD was  
216 defined as SIS>0 and more severe CAD was defined as an SSS greater than the  
217 median among those with CAD.

218

### 219 **Statistical Analysis**

220 Demographic and clinical characteristics were described by frequency (percent) for  
221 categorical variables and median (interquartile range) for continuous variables, stratified  
222 by HIV status and sex. Physical activity measures were described in a similar manner.  
223 Spearman's correlation coefficient was used to evaluate the relationship between self-  
224 reported and gold-standard objective measures of physical activity. Bland-Altman plots  
225 were used to assess the degree of agreement between the two measures of physical  
226 activity. The objective measures were subtracted from the self-reported measures to  
227 obtain measurement differences and the limits of agreement were defined as the mean  
228 difference  $\pm$  1.96 times the standard deviation of the differences. Spearman's correlation  
229 was additionally used to assess the relationship between age and objective measures  
230 of physical activity. Additionally, the Wilcoxon rank-sum test was used to compare  
231 physical activity metrics in their continuous version across binary subgroups of HIV  
232 status and sex. Chi-square tests were used to compare the proportion of those  
233 achieving at least 150 minutes of moderate-to-vigorous exercise per week and those  
234 achieving at least ten thousand steps per day by HIV status and sex.

235  
236 Unadjusted and adjusted Poisson regression models with robust standard errors were  
237 used to estimate prevalence ratios to analyze the relationship between binary measures  
238 of physical activity, by median cut points, with elevated ASCVD risk, presence of CAD  
239 among those with available CTA data, and presence of more severe CAD among those  
240 with CAD. Binary measures of physical activity were used to meet the linearity  
241 assumption of log transformation of the outcomes of interest with their physical activity  
242 predictors. Median cut points were used to allow for sufficient sample size on both sides  
243 of the selected cut points. Covariates – age and sex – were chosen a priori to build the  
244 adjustment models. HIV status and sex interaction terms, along with likelihood ratio  
245 tests, were used individually to assess for effect modification in the relationship between  
246 binary objective physical activity metrics and the presence of CAD. A schematic of the  
247 data analysis approach may be found in Supplementary Figure 1.

248  
249 R version 4.3.1 was used for analysis:  $P < 0.05$  was considered statistically significant.

## 251 **RESULTS**

### 252 **Study cohort**

253 The cohort began with 200 participants (Figure 1). The overall cohort for this analysis  
254 included 168 participants with valid accelerometry wear time, 48% of whom were  
255 PLHIV. 139 participants among those with valid accelerometry wear time had coronary  
256 angiography available for analysis (46% PLHIV). The most common reasons for missing  
257 coronary angiography were tachycardia and low eGFR.

### 258 259 **Baseline characteristics of study participants**

260 The median (IQR) age of the overall cohort was 57 (53, 62) years old and 64% were  
261 female (Table 1). The median age was similar across HIV status and sex. 84% of PLHIV  
262 had viral load suppression, and males were more likely to have HIV viral load  
263 suppression than females (94% vs 77%). Overall, smoking rates were low (2.4%) and  
264 no females reported smoking. The median systolic blood pressure was higher in males  
265 than in females [155 mmHg (139-171) vs 146 (131-162)]. Males had higher ASCVD 10-

266 year risk than females [13% (8-24) vs 6% (3-10)]. Males had lower body mass index  
267 than females [25 (23-28) vs 31 (27-34)].

268

### 269 **Relationship between self-reported and objective measures of physical activity**

270 There was no statistically significant correlation between self-reported measures of  
271 physical activity and objective gold-standard measures of physical activity ( $\rho=0.06$ ,  
272  $P=0.529$  for sedentary time;  $\rho=-0.04$ ,  $P=0.703$  for light activity time;  $\rho=-0.16$ ,  $P=0.172$   
273 for moderate-to-vigorous activity time; Supplementary Figure 2). Additionally,  
274 participants overestimated their moderate-to-vigorous activity and underestimated their  
275 light activity; and these errors in estimation were enhanced as self-reported or  
276 objectively measured physical activity increased. Objective measures of physical activity  
277 were used for the remainder of the analysis.

278

### 279 **Objective physical activity outcomes of study participants**

280 The median (IQR) accelerometry valid wear days for the total cohort was 6 (6-7) days  
281 during the 7 days in which objective measures of physical activity were collected. The  
282 median step counts per day was higher for males than for females [6,534 steps (5,073-  
283 9,178) vs 5,382 steps (3,808-7,316),  $P=0.005$ ], and males were more likely to achieve  
284 at least 10,000 steps per day than females (16% vs 5%,  $P=0.023$ ). Males had more  
285 moderate-to-vigorous physical activity per week [68 minutes (12-144) vs 15 minutes (0-  
286 50),  $P<0.001$ ] than females and a greater proportion of men achieved at least 150  
287 minutes of moderate-to-vigorous physical activity per week than females (21% vs 5%,  
288  $P=0.002$ ). Males had less light physical activity per week [788 minutes (497-1,202) vs  
289 [1,059 (730-1490),  $P=0.001$ ] than females. There was no significant difference in  
290 objective physical activity outcomes when comparing PLHIV and POWH.

291

292 There was a statistically significant positive correlation between age and sedentary time  
293 (Spearman's correlation coefficient,  $\rho=0.22$ ,  $P=0.004$ ) and a statistically significant  
294 negative correlation between age and moderate-to-vigorous physical activity ( $\rho=-0.25$ ,  
295  $P=0.001$ ), and steps per day ( $\rho=-0.31$ ,  $P<0.001$ ) (Supplementary Figure 3). The  
296 negative correlation between age and light physical activity was not statistically  
297 significant ( $\rho=-0.12$ ,  $P=0.113$ ).

298

### 299 **Association of objective physical activity outcomes and atherosclerotic 300 cardiovascular disease risk and coronary artery disease**

301 Prior to adjusting for age and sex, participants who achieved at least 15.7 hours of light  
302 physical activity per week (the median in the total cohort) had non-statistically significant  
303 19% lower prevalence of elevated ASCVD risk compared to those who had less than  
304 15.7 hours of light physical activity per week (unadjusted prevalence ratio (PR) 0.807,  
305 95% CI 0.649-1.002,  $P=0.053$ ). This association was weakened after adjustment for age  
306 and sex. Prior to adjustment, there was a general non-statistically significant association  
307 of decreased risk of elevated ASCVD risk with more physical activity and increased risk  
308 of elevated ASCVD risk with more sedentary time for the overall cohort.

309

310 For the total cohort, no statistically significant association was found between physical  
311 activity metrics and presence of CCTA-detected CAD prior to and after adjustment. Prior



312 to adjustment, there was a general non-statistically significant trend of lower risk of CTA-  
313 detected CAD with more physical activity and greater risk of CAD with greater sedentary  
314 time for the overall cohort.

315  
316 After stratifying by HIV status and prior to adjustment, there was a trend of lower risk of  
317 CT-detected CAD in PLHIV with more light physical activity compared to PWOH  
318 [unadjusted PR 0.259, 95% CI 0.057-1.188,  $P=0.082$  vs unadjusted PR 1.461, 95% CI  
319 0.675-3.160,  $P=0.336$ ] with a statistically significant interaction  $P$ -value of 0.025. After  
320 adjustment, the interaction was no longer statistically significant.

321  
322 Similarly, there was no significant interaction of sex on the relationship between physical  
323 activity metrics and the presence of CTA-detected CAD prior to and after adjustment.

324  
325 Prior to and after adjustment, there was a general non-statistically significant trend of  
326 lower risk of more severe CTA-detected CAD with more physical activity and higher risk  
327 of more severe CTA-detected CAD with more sedentary time.

## 328 329 **DISCUSSION**

330 Self-reported measures of physical activity, such as IPAQ-SF have been described as a  
331 cost-effective method to assess physical activity<sup>20</sup>. In this study, we collected and  
332 compared self-reported and objective measures of physical activity by way of the IPAQ-  
333 SF and accelerometry, respectively. We demonstrated self-reported moderate-to-  
334 vigorous activity was overestimated while self-reported light activity was  
335 underestimated, and we did not find a statistically significant correlation between self-  
336 reported and objective physical activity metrics. These results were consistent with other  
337 investigations seeking to validate IPAQ-SF<sup>9</sup>, and highlights the potential role of objective  
338 measurement instruments in physical activity studies.

339  
340 This is the first study to describe objective measures of physical activity among PLHIV  
341 and PWOH living in Uganda. While we did not find a significant difference in physical  
342 activity patterns between well-matched PLHIV and PWOH, we found significant  
343 differences between males and females. On average, males had 21% more steps per  
344 day and spent almost five times as much time engaging in moderate-to-vigorous  
345 physical activity. On the other hand, females spent 34% more time in light physical  
346 activity. These results are generally in line with traditional gender roles among males  
347 and females observed in Uganda<sup>13</sup>. Importantly, objectively measured physical activity  
348 was low in this population in urban Uganda, as only 11% of participants overall achieved  
349 moderate-to-vigorous physical activity time of at least 150 minutes, with just 5% of  
350 females achieving this target. Several studies have demonstrated the all-cause and  
351 cardiovascular mortality benefit from achieving this level of physical activity<sup>21-23</sup>, and this  
352 target has been recommended by several international cardiovascular organizations for  
353 the mitigation of ASCVD<sup>24-27</sup>.

354  
355 A large volume of population-level evidence supports the reduction in ASCVD events  
356 with increased physical activity<sup>28,21-23</sup>, and this benefit may be mediated by an inverse  
357 relationship between physical activity and sub-clinical cardiovascular disease<sup>29</sup>. Despite

358 this, we did not find a significant association between the varied levels of physical  
359 activity and inactivity with elevated ASCVD risk after adjusting for age and sex. Similarly,  
360 we did not find a significant association between physical activity metrics with presence  
361 of CTA-detected CAD or severity of CAD with multivariable analyses. However, our  
362 univariable analyses demonstrate an overall non-statistically significant trend of lower  
363 risk of elevated ASCVD risk, CTA-detected CAD, and CAD severity with higher levels of  
364 physical activity metrics for the overall cohort, with an opposite relationship with  
365 increased sedentary time. This trend was maintained in the multivariable analysis for  
366 CAD severity. Additionally, we demonstrated that increased light physical activity had a  
367 non-statistically significant association with lower prevalence of elevated ASCVD risk,  
368 with a 19% prevalence reduction for the total cohort. We also demonstrated a significant  
369 moderating effect of HIV, such that the inverse relationship between light physical  
370 activity and CAD was stronger among PLHIV compared to PWOH. While larger studies  
371 are needed to further characterize this finding, it does suggest that even light levels of  
372 physical activity may help reduce the burden of HIV-related cardiovascular disease.

373  
374 We further assessed the correlation of age with physical activity metrics. We found that  
375 age was positively correlated with sedentary time. We demonstrated that age was  
376 negatively correlated with moderate-to-vigorous physical activity time and steps per day  
377 and explained as much as 10% of the variation in steps per day. We further  
378 demonstrated a trend of negative correlation between age and light physical activity  
379 time. These correlations help inform the relationship between physical activity metrics  
380 and ASCVD risk, CAD, and presence of more severe CAD within the Ugandan context.  
381 Given the trends of physical activity benefits seen in this study, it may indicate a role for  
382 encouraging lifelong exercise, especially as one ages. This further attracts attention to  
383 the potential need to promote physical activity in Africa, especially as it continues to  
384 industrialize.

### 385 386 **Strengths and Limitations**

387 This work contains several important strengths including the use of gold-standard  
388 objective measures of physical activity and atherosclerotic CAD. We have shown that  
389 self-reported physical activity is not a good measure of objectively measured physical  
390 activity, arguing for the use of objective measures whenever feasible. Our prior  
391 research has also shown that ASCVD risk scores do not correlate well with objectively  
392 measured subclinical atherosclerosis in Uganda, and thus risk scores should not be  
393 used as a surrogate marker of subclinical ASCVD<sup>10</sup>.

394  
395 However, our study also has limitations. First, it is possible that our sample size was  
396 not sufficient to detect significant associations between physical activity metrics and the  
397 outcomes described. Secondly, this was a cross-sectional analysis where measures of  
398 physical activity were assessed for a short period of 7 days. Although wearing the  
399 physical activity monitor during 7 days with a minimum of 4 days of valid data is  
400 recommended<sup>30</sup>, this did not capture the majority of lifetime physical activity habits that  
401 would inform the relationship with ASCVD risk, CAD, and severity of CAD. Thirdly, it is  
402 possible some participants may have altered their physical activity habits with the  
403 awareness of monitoring. Additionally, as this was an observational study, the

404 univariable trends and associations seen cannot be construed as causal. Lastly, this  
405 was a single-center study based near the commercial capital of Uganda and the results  
406 might not be generalizable to those living in more rural areas.

407

#### 408 **CONCLUSION**

409 In this unique study from Africa, objectively measured physical activity was low in Urban  
410 Uganda compared to guideline recommendations, with males being somewhat more  
411 active than females and without significant differences by HIV status. Physical activity  
412 was not statistically significantly associated with the presence of CAD independently of  
413 age and sex. However, these hypothesis generating findings require further research  
414 with larger studies.

415

#### 416 **SOURCES OF FUNDING**

417 This work was supported by the National Heart, Lung, and Blood Institute of the  
418 National Institutes of Health (K23 HL123341 to CTL).

419

#### 420 **DISCLOSURES**

421 The authors have no relevant conflicts of interest.

422 **REFERENCES**

- 423 1. Farahani M, Mulinder H, Farahani A, Marlink R. Prevalence and distribution of non-  
424 AIDS causes of death among HIV-infected individuals receiving antiretroviral therapy:  
425 a systematic review and meta-analysis. *Int J STD AIDS*. 2017;28(7):636-650.  
426 doi:10.1177/0956462416632428
- 427 2. Shah ASV, Stelzle D, Lee KK, et al. Global Burden of Atherosclerotic Cardiovascular  
428 Disease in People Living with the Human Immunodeficiency Virus: A Systematic  
429 Review and Meta-Analysis. *Circulation*. 2018;138(11):1100-1112.  
430 doi:10.1161/CIRCULATIONAHA.117.033369
- 431 3. Okello S, Amir A, Bloomfield GS, et al. Prevention of cardiovascular disease among  
432 people living with HIV in sub-Saharan Africa. *Prog Cardiovasc Dis*. 2020;63(2):149-  
433 159. doi:10.1016/j.pcad.2020.02.004
- 434 4. Grinspoon Steven, Carr Andrew. Cardiovascular Risk and Body-Fat Abnormalities in  
435 HIV-Infected Adults. *New England Journal of Medicine*. 2005;352(1):48-62.  
436 doi:10.1056/NEJMra041811
- 437 5. Grunfeld C, Pang M, Doerrler W, Shigenaga JK, Jensen P, Feingold KR. Lipids,  
438 lipoproteins, triglyceride clearance, and cytokines in human immunodeficiency virus  
439 infection and the acquired immunodeficiency syndrome. *The Journal of Clinical*  
440 *Endocrinology & Metabolism*. 1992;74(5):1045-1052. doi:10.1210/jcem.74.5.1373735
- 441 6. Ozemek C, Erlandson KM, Jankowski CM. Physical activity and exercise to improve  
442 cardiovascular health for adults living with HIV. *Progress in Cardiovascular Diseases*.  
443 2020;63(2):178-183. doi:10.1016/j.pcad.2020.01.005
- 444 7. Ezema CI, Onwunali AA, Lamina S, Ezugwu UA, Amaeze AA, Nwankwo MJ. Effect of  
445 aerobic exercise training on cardiovascular parameters and CD4 cell count of people  
446 living with human immunodeficiency virus/acquired immune deficiency syndrome: a  
447 randomized controlled trial. *Niger J Clin Pract*. 2014;17(5):543-548. doi:10.4103/1119-  
448 3077.141414
- 449 8. Vancampfort D, Stubbs B, Mugisha J. Physical activity and HIV in sub-Saharan  
450 Africa: a systematic review of correlates and levels. *Afr Health Sci*. 2018;18(2):394-  
451 406. doi:10.4314/ahs.v18i2.25
- 452 9. Lee PH, Macfarlane DJ, Lam T, Stewart SM. Validity of the international physical  
453 activity questionnaire short form (IPAQ-SF): A systematic review. *Int J Behav Nutr*  
454 *Phys Act*. 2011;8(1):115. doi:10.1186/1479-5868-8-115
- 455 10. Alencherry B, Erem G, Mirembe G, et al. Coronary artery calcium, HIV and  
456 inflammation in Uganda compared with the USA. *Open Heart*. 2019;6(1):e001046.  
457 doi:10.1136/openhrt-2019-001046

- 458 11. Bugey J, Yun CH, Hung CL, et al. HIV and Pericardial Fat are Associated with  
459 Abnormal Cardiac Structure and Function among Ugandans. *Heart*. 2020;106(2):147-  
460 153. doi:10.1136/heartjnl-2019-315346
- 461 12. Peters M, Margevicius S, Kityo C, et al. Association of Kidney Disease With  
462 Abnormal Cardiac Structure and Function Among Ugandans With HIV Infection.  
463 *JAIDS Journal of Acquired Immune Deficiency Syndromes*. 2021;86(1):104.  
464 doi:10.1097/QAI.0000000000002529
- 465 13. Sex modifies the association between HIV and coronary artery disease among  
466 older adults in Uganda - Longenecker - 2022 - Journal of the International AIDS  
467 Society - Wiley Online Library. Accessed April 2, 2024.  
468 <https://onlinelibrary.wiley.com/doi/10.1002/jia2.25868>
- 469 14. Knaier R, Höchsmann C, Infanger D, Hinrichs T, Schmidt-Trucksäss A. Validation  
470 of automatic wear-time detection algorithms in a free-living setting of wrist-worn and  
471 hip-worn ActiGraph GT3X+. *BMC Public Health*. 2019;19:244. doi:10.1186/s12889-  
472 019-6568-9
- 473 15. Airlie J, Forster A, Birch KM. An investigation into the optimal wear time criteria  
474 necessary to reliably estimate physical activity and sedentary behaviour from  
475 ActiGraph wGT3X+ accelerometer data in older care home residents. *BMC*  
476 *Geriatrics*. 2022;22(1):136. doi:10.1186/s12877-021-02725-6
- 477 16. Craig CL, Marshall AL, Sjöström M, et al. International Physical Activity  
478 Questionnaire: 12-Country Reliability and Validity. *Medicine & Science in Sports &*  
479 *Exercise*. 2003;35(8):1381. doi:10.1249/01.MSS.0000078924.61453.FB
- 480 17. Sasaki JE, John D, Freedson PS. Validation and comparison of ActiGraph activity  
481 monitors. *Journal of Science and Medicine in Sport*. 2011;14(5):411-416.  
482 doi:10.1016/j.jsams.2011.04.003
- 483 18. Arnett DK, Blumenthal RS, Albert MA, et al. 2019 ACC/AHA Guideline on the  
484 Primary Prevention of Cardiovascular Disease: A Report of the American College of  
485 Cardiology/American Heart Association Task Force on Clinical Practice Guidelines.  
486 *Circulation*. 2019;140(11):e596-e646. doi:10.1161/CIR.0000000000000678
- 487 19. Abbara S, Blanke P, Maroules CD, et al. SCCT guidelines for the performance  
488 and acquisition of coronary computed tomographic angiography: A report of the  
489 Society of Cardiovascular Computed Tomography Guidelines Committee: Endorsed  
490 by the North American Society for Cardiovascular Imaging (NASCI). *Journal of*  
491 *Cardiovascular Computed Tomography*. 2016;10(6):435-449.  
492 doi:10.1016/j.jcct.2016.10.002
- 493 20. Warren JM, Ekelund U, Besson H, Mezzani A, Geladas N, Vanhees L.  
494 Assessment of physical activity – a review of methodologies with reference to  
495 epidemiological research: a report of the exercise physiology section of the European  
496 Association of Cardiovascular Prevention and Rehabilitation. *European journal of*

- 497      *cardiovascular prevention and rehabilitation*. 2010;17(2):127-139.  
498      doi:10.1097/HJR.0b013e32832ed875
- 499      21.      Lee DH, Rezende LFM, Joh HK, et al. Long-Term Leisure-Time Physical Activity  
500      Intensity and All-Cause and Cause-Specific Mortality: A Prospective Cohort of US  
501      Adults. *Circulation*. 2022;146(7):523-534.  
502      doi:10.1161/CIRCULATIONAHA.121.058162
- 503      22.      Shiroma EJ, Sesso HD, Moorthy MV, Buring JE, Lee I. Do Moderate- Intensity  
504      and Vigorous- Intensity Physical Activities Reduce Mortality Rates to the Same  
505      Extent? *Journal of the American Heart Association*. 3(5):e000802.  
506      doi:10.1161/JAHA.114.000802
- 507      23.      Gebel K, Ding D, Chey T, Stamatakis E, Brown WJ, Bauman AE. Effect of  
508      Moderate to Vigorous Physical Activity on All-Cause Mortality in Middle-aged and  
509      Older Australians. *JAMA Internal Medicine*. 2015;175(6):970-977.  
510      doi:10.1001/jamainternmed.2015.0541
- 511      24.      Laranjo L, Lanas F, Sun MC, et al. World Heart Federation Roadmap for  
512      Secondary Prevention of Cardiovascular Disease: 2023 Update. *Glob Heart*. 19(1):8.  
513      doi:10.5334/gh.1278
- 514      25.      Piercy KL, Troiano RP. Physical Activity Guidelines for Americans From the US  
515      Department of Health and Human Services. *Circulation: Cardiovascular Quality and  
516      Outcomes*. 2018;11(11):e005263. doi:10.1161/CIRCOUTCOMES.118.005263
- 517      26.      The Physical Activity Guidelines for Americans | Lifestyle Behaviors | JAMA |  
518      JAMA Network. Accessed May 7, 2024. [https://jamanetwork-](https://jamanetwork.com/offcampus.lib.washington.edu/journals/jama/fullarticle/2712935)  
519      [com.offcampus.lib.washington.edu/journals/jama/fullarticle/2712935](https://jamanetwork.com/offcampus.lib.washington.edu/journals/jama/fullarticle/2712935)
- 520      27.      Keijzer' 'Adine R. de, Kauling' 'Robert M., Jorstad' 'Harald, Roos-Hesselink'  
521      'Jolien W. Physical activity for cardiovascular prevention. Accessed May 7, 2024.  
522      [https://www.escardio.org/Councils/Council-for-Cardiology-Practice-](https://www.escardio.org/Councils/Council-for-Cardiology-Practice-(CCP)/Cardiopactice/physical-activity-for-cardiovascular-prevention)  
523      [\(\(CCP\)/Cardiopactice/physical-activity-for-cardiovascular-prevention,](https://www.escardio.org/Councils/Council-for-Cardiology-Practice-(CCP)/Cardiopactice/physical-activity-for-cardiovascular-prevention)  
524      [https://www.escardio.org/Councils/Council-for-Cardiology-Practice-](https://www.escardio.org/Councils/Council-for-Cardiology-Practice-(CCP)/Cardiopactice/physical-activity-for-cardiovascular-prevention)  
525      [\(\(CCP\)/Cardiopactice/physical-activity-for-cardiovascular-prevention](https://www.escardio.org/Councils/Council-for-Cardiology-Practice-(CCP)/Cardiopactice/physical-activity-for-cardiovascular-prevention)
- 526      28.      Chastin SFM, De Craemer M, De Cocker K, et al. How does light-intensity  
527      physical activity associate with adult cardiometabolic health and mortality?  
528      Systematic review with meta-analysis of experimental and observational studies. *Br J  
529      Sports Med*. 2019;53(6):370-376. doi:10.1136/bjsports-2017-097563
- 530      29.      Narendrula A, Brinza E, Horvat Davey C, Longenecker CT, Webel AR.  
531      Relationship between objectively measured physical activity and subclinical  
532      cardiovascular disease: a systematic review. *BMJ Open Sport Exerc Med*.  
533      2024;10(1):e001596. doi:10.1136/bmjsem-2023-001596

534 30. Migueles JH, Cadenas-Sanchez C, Ekelund U, et al. Accelerometer Data  
535 Collection and Processing Criteria to Assess Physical Activity and Other Outcomes: A  
536 Systematic Review and Practical Considerations. *Sports Med.* 2017;47(9):1821-1845.  
537 doi:10.1007/s40279-017-0716-0

538

539 *Figure 1. Derivation of the study population from the mUTIMA-CT cohort. Definitions:*  
540 *PLHIV, people living with HIV; CTA, computed tomography angiography; eGFR,*  
541 *estimated glomerular filtration rate.*

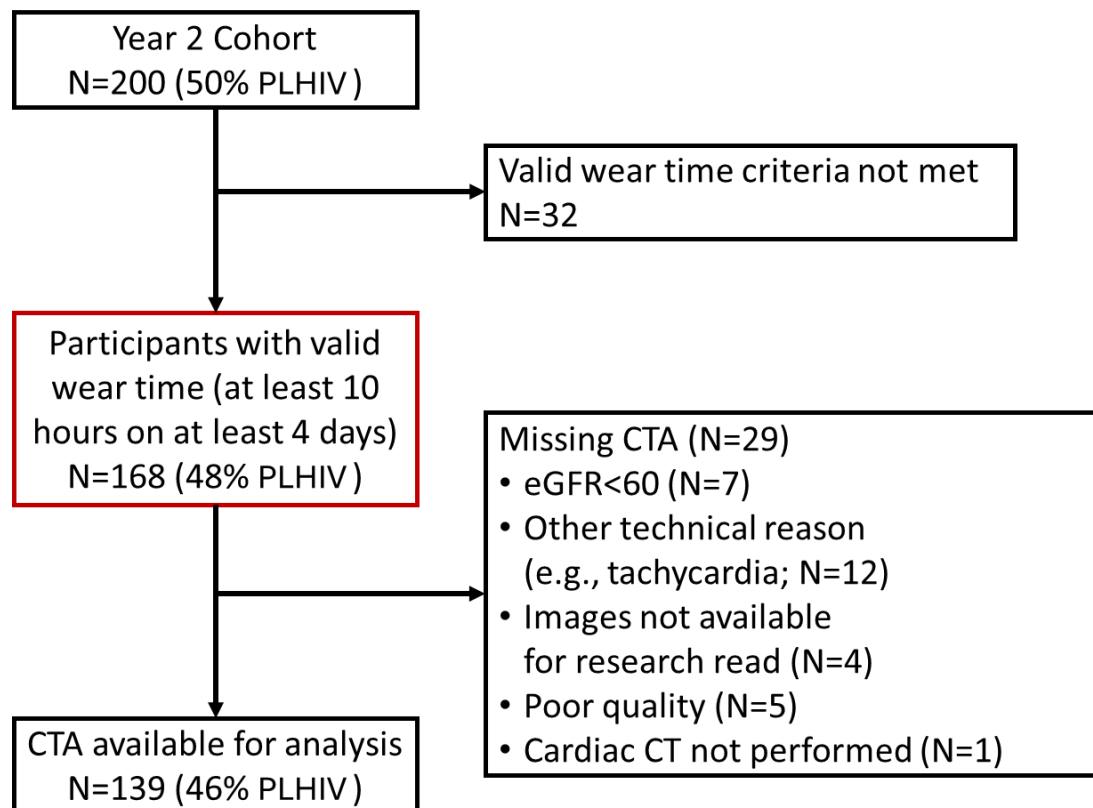

542



**Table 1. Baseline demographic and clinical characteristics, stratified by HIV status and sex**

|                                        | HIV (+) Male<br>N = 32 | HIV (+) Female<br>N = 48 | HIV (-) Male<br>N = 29 | HIV (-) Female<br>N = 59 |
|----------------------------------------|------------------------|--------------------------|------------------------|--------------------------|
| Age in years, median (IQR)             | 55.00 (51.50, 62.25)   | 56.50 (53.00, 62.00)     | 60.00 (51.00, 62.00)   | 58.00 (55.00, 63.50)     |
| Diabetes, (%)                          | 9 (28.1)               | 14 (29.2)                | 17 (58.6)              | 22 (37.3)                |
| Hypertension, (%)                      | 26 (81.2)              | 43 (89.6)                | 23 (79.3)              | 56 (94.9)                |
| Smoking status, (%)                    |                        |                          |                        |                          |
| Smoke every day                        | 1 (3.1)                | 0 (0.0)                  | 1 (3.4)                | 0 (0.0)                  |
| Smoke, not every day                   | 2 (6.2)                | 0 (0.0)                  | 0 (0.0)                | 0 (0.0)                  |
| No smoking                             | 29 (90.6)              | 48 (100.0)               | 28 (96.6)              | 59 (100.0)               |
| Alcohol use frequency, (%)             |                        |                          |                        |                          |
| Never                                  | 20 (62.5)              | 41 (89.1)                | 17 (60.7)              | 44 (78.6)                |
| Monthly or less                        | 9 (28.1)               | 3 (6.5)                  | 3 (10.7)               | 8 (14.3)                 |
| 2-4 times per month                    | 0 (0.0)                | 1 (2.2)                  | 5 (17.9)               | 2 (3.6)                  |
| 2-3 times per week                     | 2 (6.2)                | 0 (0.0)                  | 3 (10.7)               | 0 (0.0)                  |
| 4 or more times per week               | 1 (3.1)                | 1 (2.2)                  | 0 (0.0)                | 2 (3.6)                  |
| Alcohol drinks per use, (%)            |                        |                          |                        |                          |
| 1 or 2                                 | 8 (66.7)               | 4 (66.7)                 | 5 (45.5)               | 11 (84.6)                |
| 3 or 4                                 | 4 (33.3)               | 1 (16.7)                 | 5 (45.5)               | 2 (15.4)                 |
| 5 or 6                                 | 0 (0.0)                | 1 (16.7)                 | 1 (9.1)                | 0 (0.0)                  |
| Systolic blood pressure, median (IQR)  | 153 (142, 171)         | 146 (128, 161)           | 155 (132, 171)         | 144 (132, 163)           |
| ASCVD 10-year risk score, median (IQR) | 11 (7, 21)             | 5 (3, 8)                 | 17 (11, 24.83)         | 6 (3, 12)                |
| Total cholesterol, median (IQR)        | 201 (1651, 235)        | 214(182, 242)            | 194 (167, 218)         | 195 (180, 233)           |
| Body mass index, median (IQR)          | 24 (22, 27)            | 28 (25, 33)              | 28 (24, 31)            | 33 (30, 34)              |
| Waist hip ratio, median (IQR)          | 0.93 (0.91, 0.98)      | 0.88 (0.83, 0.92)        | 0.94 (0.88, 0.97)      | 0.86 (0.81, 0.91)        |
| Years with HIV, median (IQR)           | 14.02 (12.26, 15.92)   | 13.97 (11.97, 4.54)      | -                      | -                        |
| Years with ART, median (IQR)           | 12.74 (10.73,          | 12.41 (9.80,             | -                      | -                        |

|                                 |           |           |   |   |
|---------------------------------|-----------|-----------|---|---|
|                                 | 14.71)    | 14.00)    |   |   |
| HIV viral load suppressed, (%)  | 30 (93.8) | 37 (77.1) | - | - |
| Viral load if not suppressed, % |           |           |   |   |
| 21-500                          | 1 (3.1)   | 9 (18.8)  | - | - |
| 501-1,000                       | 0 (0.0)   | 0 (0.0)   | - | - |
| >1,000                          | 1 (3.1)   | 2 (4.2)   | - | - |

---

*Definitions: IQR, interquartile range; ART, antiretroviral therapy; ASCVD, atherosclerotic cardiovascular disease risk.*

| <b>Table 2. Objectively measured physical activity stratified by (a) HIV status and (b) sex</b> |                            |                            |                |
|-------------------------------------------------------------------------------------------------|----------------------------|----------------------------|----------------|
| <b>(a). Stratified by HIV status</b>                                                            |                            |                            |                |
|                                                                                                 | <b>PLHIV, n=80</b>         | <b>PWOH, n=88</b>          | <b>P-value</b> |
| Valid wear days, median (IQR)                                                                   | 6.00 (6.00, 7.00)          | 6.00 (5.75, 7.00)          | 0.993          |
| Total step counts per day, median (IQR)                                                         | 5859.05 (4308.05, 7735.14) | 5814.08 (4027.48, 7556.35) | 0.574          |
| Light activity time per week in minutes, median (IQR)                                           | 949.08 (666.87, 1369.08)   | 934.00 (649.03, 1342.00)   | 0.881          |
| Moderate-to-vigorous activity time per week in minutes, median (IQR)                            | 18.38 (0.00, 95.88)        | 35.50 (0.00, 74.31)        | 0.889          |
| Sedentary time per week in minutes, median (IQR)                                                | 1234.50 (951.56, 1806.58)  | 1,301.00 (883.31, 1959.13) | 0.906          |
| Achieved 150 minutes moderate-to-vigorous activity or more per week, (%)                        | 11 (13.8)                  | 7 (8.0)                    | 0.335          |
| Achieved 10 thousand steps or more per day, (%)                                                 | 9 (11.2)                   | 6 (6.8)                    | 0.462          |
| <b>(b). Stratified by sex</b>                                                                   |                            |                            |                |
|                                                                                                 | <b>Male, n=61</b>          | <b>Female, n=107</b>       | <b>P-value</b> |
| Valid wear days, median (IQR)                                                                   | 6.00 (6.00, 7.00)          | 6.00 (6.00, 7.00)          | 0.757          |
| Total step counts per day, median (IQR)                                                         | 6534.00 (5073.00, 9177.50) | 5382.33 (3807.58, 7316.42) | 0.005          |
| Light activity time per week in minutes, median (IQR)                                           | 788.00 (497.00, 1201.67)   | 1059.00 (730.40, 1490.42)  | 0.001          |
| Moderate-to-vigorous activity time per week in minutes, median (IQR)                            | 68.00 (11.67, 143.50)      | 15.17 (0.00, 49.50)        | <0.001         |
| Sedentary time per week in minutes, median (IQR)                                                | 1320.67 (1079.17, 1850.33) | 1203.00 (873.25, 1916.83)  | 0.303          |
| Achieved 150 minutes moderate-to-vigorous activity or more per week, (%)                        | 13 (21.3)                  | 5 (4.7)                    | 0.002          |
| Achieved 10 thousand steps or more per day, (%)                                                 | 10 (16.4)                  | 5 (4.7)                    | 0.023          |

*Definitions: IQR, interquartile range; PLHIV, people living with HIV; PWOH, people without HIV*

**Table 3. Unadjusted and adjusted associations of objective physical activity metrics with ASCVD 10-year risk  $\geq$  5%, n=168**

|                                                              | Unadjusted          |         | Adjusted            |         |
|--------------------------------------------------------------|---------------------|---------|---------------------|---------|
|                                                              | PR (95% CI)         | P-value | PR                  | P-value |
| Total step counts per day $\geq$ 5.9 thousand                | 0.954 (0.770-1.181) | 0.663   | 1.042 (0.850-1.277) | 0.694   |
| Light activity time per week $\geq$ 15.7 hours               | 0.807 (0.649-1.002) | 0.053   | 0.991 (0.821-1.195) | 0.922   |
| Moderate-to-vigorous activity time per week $\geq$ 0.4 hours | 0.909 (0.734-1.126) | 0.383   | 0.934 (0.770-1.134) | 0.491   |
| Sedentary time per week $\geq$ 21 hours                      | 1.049 (.847-1.299)  | 0.663   | 0.864 (0.714-1.045) | 0.131   |

*Definitions: ASCVD, atherosclerotic cardiovascular disease risk; PR, prevalence ratio; CI, confidence interval. Adjusted for age and sex.*

**Table 4. Unadjusted and adjusted associations of objective physical activity metrics with presence of CTA-detected CAD for (a) the overall cohort with available CTA, stratified by HIV status [(b) and (c)] and by sex [(d) and (e)]**

| <b>(a) Participants with available CTA, n=139</b>       |                     |                 |                     |                 |                      |
|---------------------------------------------------------|---------------------|-----------------|---------------------|-----------------|----------------------|
|                                                         | <b>Unadjusted</b>   |                 | <b>Adjusted</b>     |                 |                      |
|                                                         | PR (95% CI)         | <i>P</i> -value | PR                  | <i>P</i> -value | <i>P<sub>i</sub></i> |
| Total step counts per day ≥ 5.9 thousand                | 0.904 (0.467-1.752) | 0.765           | 1.699 (0.854-3.381) | 0.131           | -                    |
| Light activity time per week ≥ 15.7 hours               | 0.878 (0.453-1.702) | 0.701           | 1.459 (0.691-3.079) | 0.322           | -                    |
| Moderate-to-vigorous activity time per week ≥ 0.4 hours | 0.678 (0.347-1.326) | 0.256           | 0.957 (0.534-1.717) | 0.883           | -                    |
| Sedentary time per week ≥ 21 hours                      | 1.240 (0.638-2.409) | 0.526           | 0.715 (0.364-1.406) | 0.331           | -                    |
| <b>(b) Stratification by HIV status, unadjusted</b>     |                     |                 |                     |                 |                      |
|                                                         | <b>PLWHIV, n=64</b> |                 | <b>PWOH, n=75</b>   |                 |                      |
|                                                         | PR (95% CI)         | <i>P</i> -value | PR (95% CI)         | <i>P</i> -value | <i>P<sub>i</sub></i> |
| Total step counts per day ≥ 5.9 thousand                | 0.778 (0.213-2.839) | 0.704           | 1.027 (0.485-2.176) | 0.945           | 0.162                |
| Light activity time per week ≥ 15.7 hours               | 0.259 (0.057-1.188) | 0.082           | 1.461 (0.657-3.160) | 0.336           | 0.025                |
| Moderate-to-vigorous activity time per week ≥ 0.4 hours | 0.939 (0.257-3.434) | 0.925           | 0.583 (0.270-1.261) | 0.171           | 0.137                |
| Sedentary time per week ≥ 21 hours                      | 2.012 (0.525-7.713) | 0.308           | 0.974 (0.460-2.063) | 0.945           | 0.121                |
| <b>(c) Stratification by HIV status, adjusted</b>       |                     |                 |                     |                 |                      |
|                                                         | <b>PLWHIV, n=64</b> |                 | <b>PWOH, n=75</b>   |                 |                      |
|                                                         | PR (95% CI)         | <i>P</i> -value | PR (95% CI)         | <i>P</i> -value | <i>P<sub>i</sub></i> |
| Total step counts per day ≥ 5.9 thousand                | 1.151 (0.296-4.472) | 0.840           | 2.332 (1.031-5.277) | 0.042           | 0.332                |
| Light activity time per week ≥ 15.7 hours               | 0.300 (0.068-1.323) | 0.112           | 2.436 (1.019-5.824) | 0.045           | 0.192                |

|                                                              |                     |       |                     |       |       |
|--------------------------------------------------------------|---------------------|-------|---------------------|-------|-------|
| Moderate-to-vigorous activity time per week $\geq$ 0.4 hours | 1.110 (0.324-3.802) | 0.868 | 1.130 (0.572-2.232) | 0.726 | 0.440 |
| Sedentary time per week $\geq$ 21 hours                      | 1.229 (0.290-5.203) | 0.780 | 0.545 (0.249-1.193) | 0.129 | 0.421 |

**(d) Stratification by sex status, unadjusted**

|                                                              | Male, n=51          |            | Female, n=88        |            | $P_i$ |
|--------------------------------------------------------------|---------------------|------------|---------------------|------------|-------|
|                                                              | PR (95% CI)         | $P$ -value | PR (95% CI)         | $P$ -value |       |
| Total step counts per day $\geq$ 5.9 thousand                | 1.129 (0.379-3.366) | 0.828      | 0.767 (0.321-1.831) | 0.550      | 0.843 |
| Light activity time per week $\geq$ 15.7 hours               | 0.886 (0.297-2.641) | 0.828      | 0.900 (0.379-2.137) | 0.810      | 0.977 |
| Moderate-to-vigorous activity time per week $\geq$ 0.4 hours | 0.800 (0.273-2.348) | 0.685      | 0.548 (0.211-1.424) | 0.217      | 0.769 |
| Sedentary time per week $\geq$ 21 hours                      | 1.556 (0.519-4.666) | 0.431      | 1.067 (0.454-2.508) | 0.882      | 0.866 |

**(e) Stratification by sex status, adjusted**

|                                                              | Male, n=51          |            | Female, n=88        |            | $P_i$ |
|--------------------------------------------------------------|---------------------|------------|---------------------|------------|-------|
|                                                              | PR (95% CI)         | $P$ -value | PR (95% CI)         | $P$ -value |       |
| Total step counts per day $\geq$ 5.9 thousand                | 2.217 (0.861-5.710) | 0.099      | 1.455 (0.566-3.740) | 0.437      | 0.567 |
| Light activity time per week $\geq$ 15.7 hours               | 1.535 (0.401-5.884) | 0.532      | 1.400 (0.588-3.336) | 0.448      | 0.805 |
| Moderate-to-vigorous activity time per week $\geq$ 0.4 hours | 1.462 (0.608-3.515) | 0.396      | 0.704 (0.304-1.629) | 0.412      | 0.349 |
| Sedentary time per week $\geq$ 21 hours                      | 0.830 (0.258-2.676) | 0.755      | 0.675 (0.297-1.534) | 0.348      | 0.958 |

*Definitions: CAD, coronary artery disease; PR, prevalence ratio; CI, confidence interval;  $P_i$ , P-value for interaction. Adjusted for age and sex.*



**Table 5. Unadjusted and adjusted associations of objective physical activity metrics with more severe CTA-detected CAD, n=28**

|                                                              | Unadjusted          |         | Adjusted            |         |
|--------------------------------------------------------------|---------------------|---------|---------------------|---------|
|                                                              | PR (95% CI)         | P-value | PR                  | P-value |
| Total step counts per day $\geq$ 5.9 thousand                | 0.429 (0.138-1.329) | 0.142   | 0.480 (0.128-1.797) | 0.276   |
| Light activity time per week $\geq$ 15.7 hours               | 0.429 (0.138-1.329) | 0.142   | 0.464 (0.138-1.559) | 0.214   |
| Moderate-to-vigorous activity time per week $\geq$ 0.4 hours | 0.571 (0.185-1.763) | 0.330   | 0.624 (0.199-1.955) | 0.418   |
| Sedentary time per week $\geq$ 21 hours                      | 2.022 (0.653-6.262) | 0.222   | 1.676 (0.464-6.051) | 0.430   |

*Definitions: CAD, coronary artery disease; PR, prevalence ratio; CI, confidence interval. Adjusted for age and sex.*



Supplementary Figure 1. Depicts flow of data analysis among study participants. Objective physical activity metrics were used for analysis. Definitions: ASCVD, atherosclerotic cardiovascular disease risk; CAD, coronary artery disease.

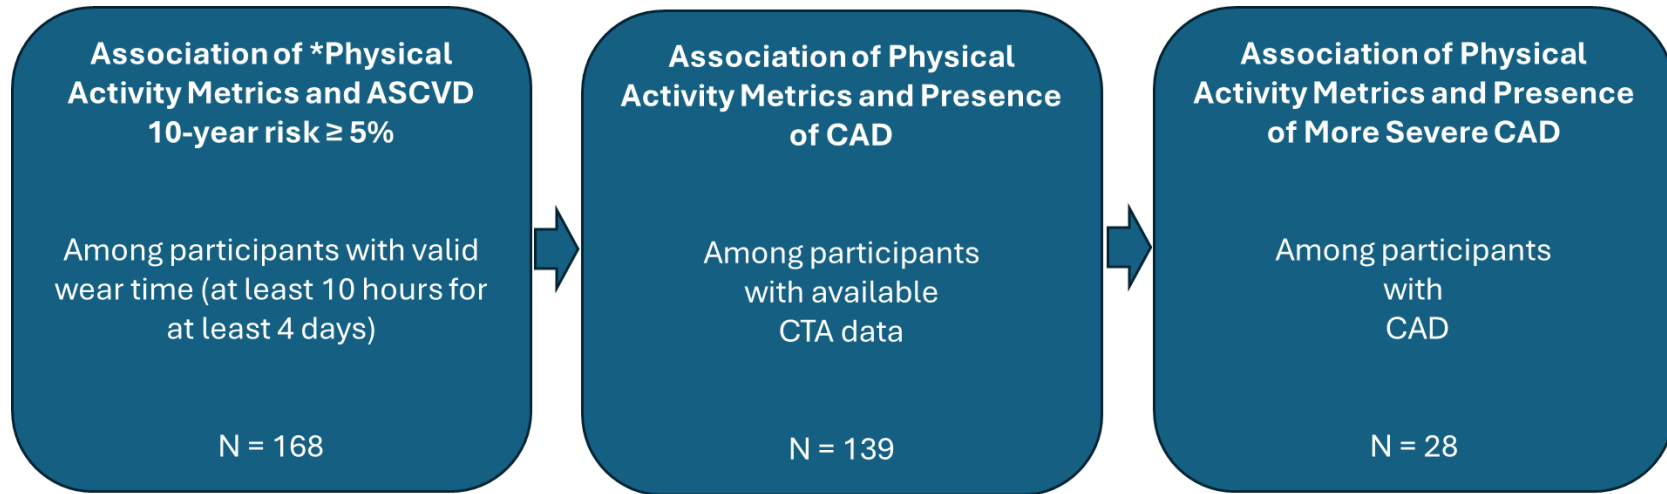

\*Binary cut point for physical activity metrics = median values of individual metrics among those with valid wear time

- Steps per day – 5,900 steps
- Light physical activity per week – 15.7 hours
- Moderate-to-vigorous activity per week – 0.4 hours
- Sedentary time per week - 21.0 hours

Supplementary Figure 2. Relationship between self-reported and objective measures of physical activity. (a), (b), and (c) demonstrate scatter plots and Spearman's correlation for self-reported vs objectively measured sedentary, light activity, and moderate-to-vigorous activity time, respectively. (d), (e), and (f) demonstrate Bland-Altman plots discerning the degree of agreement between self-reported vs objectively measured sedentary, light activity, and moderate-to-vigorous activity time.

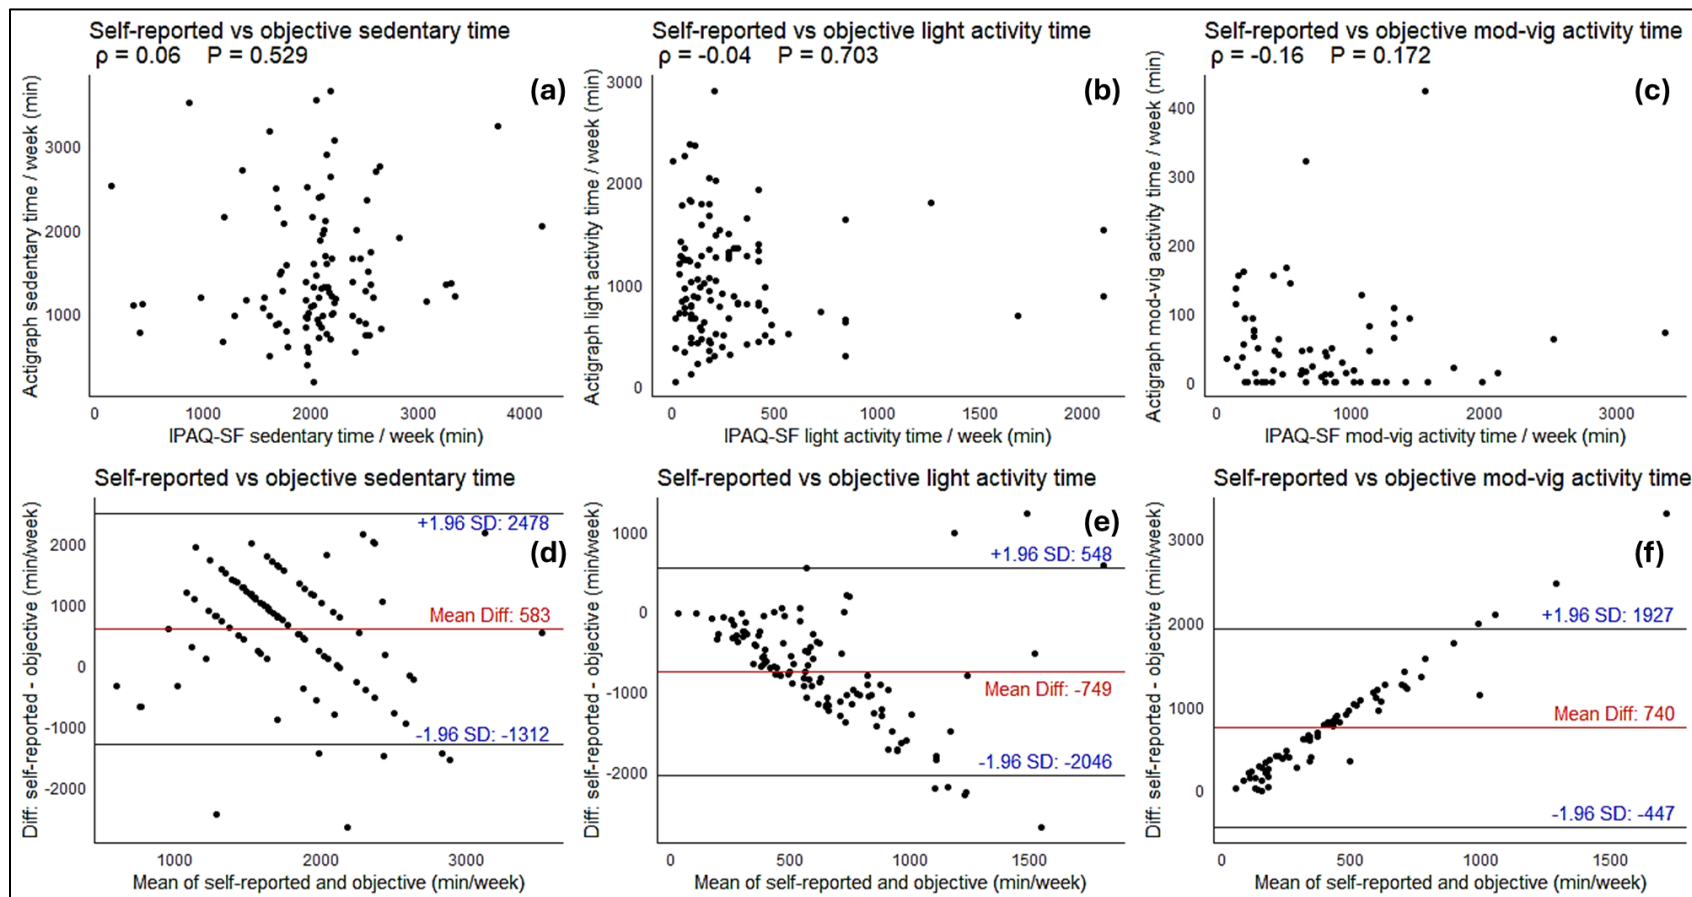

Definitions:  $\rho = rho =$  Spearman's coefficient; Diff, difference; SD, standard deviation

Supplementary Figure 3. Correlation of age with objective measures of (a) sedentary time, (b) light activity time, (c) moderate-to-vigorous activity time, and (d) steps per day.

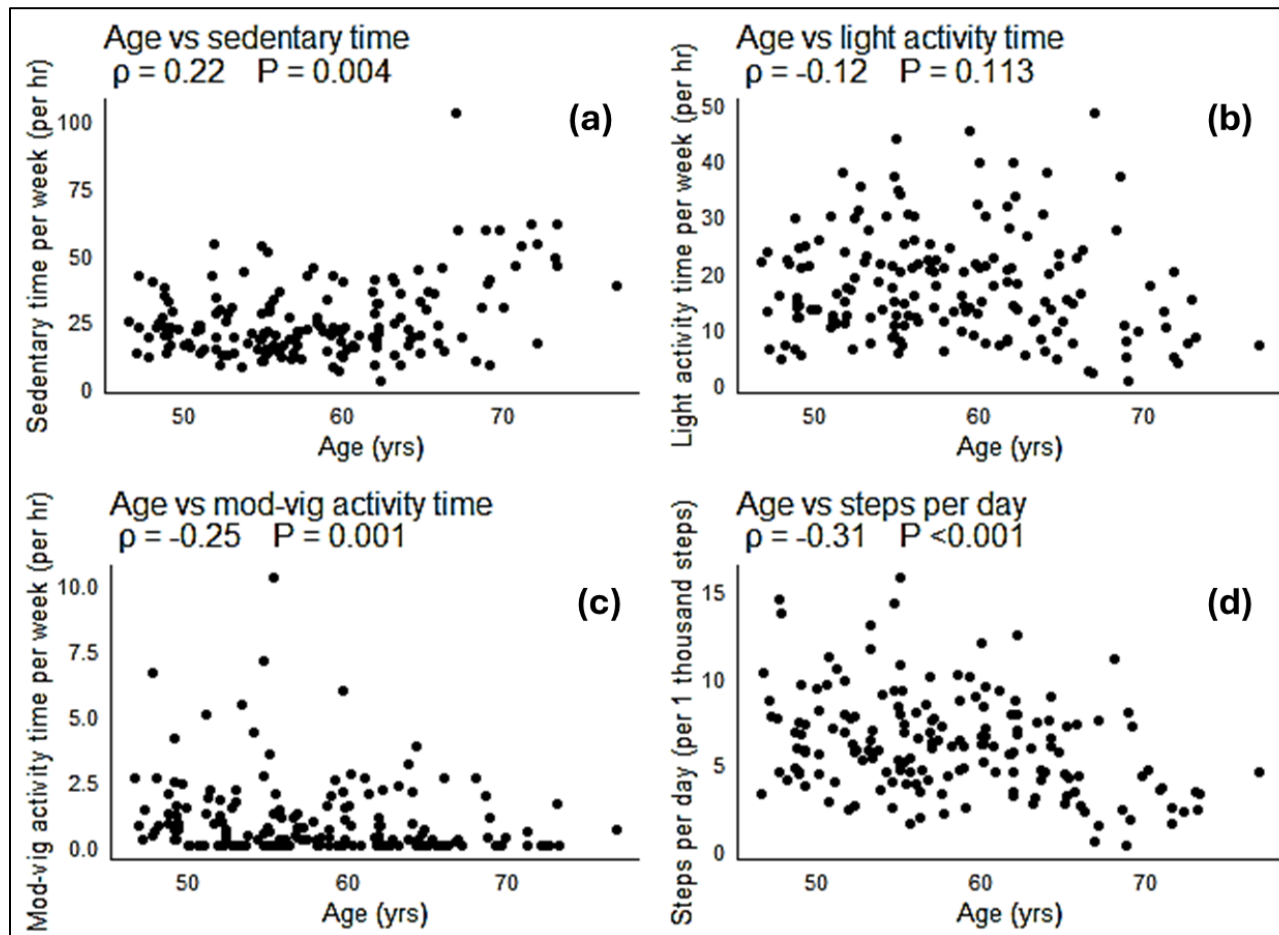

Definitions:  $\rho = rho =$  Spearman's coefficient
